# Supplementary material for: One-step potentiostatic electrodeposition of NiS–NiS2 on sludge-based biochar and its application for a non-enzymatic glucose sensor
Source: Royal Society of Chemistry journal article supplement (doi:10.1039/d2ra07950j), 2023-01-01
Supplement: d2ra07950j1.pdf [file d2ra07950j1.pdf]

# One-step Potentiostatic Electrodeposition of NiS- NiS<sub>2</sub> on Sludge-based Biochar and its Application for Non-enzymatic Glucose Sensor

Suxing Luo\*<sup>a</sup>, Meizhi Yang<sup>b</sup>, Jiang Li<sup>c</sup>, Yuanhui Wu\*<sup>a</sup>

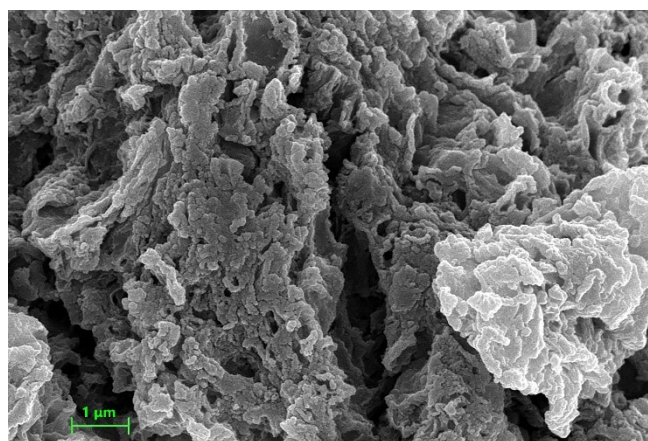

Figure S1 SEM images of sludge-based biochar.

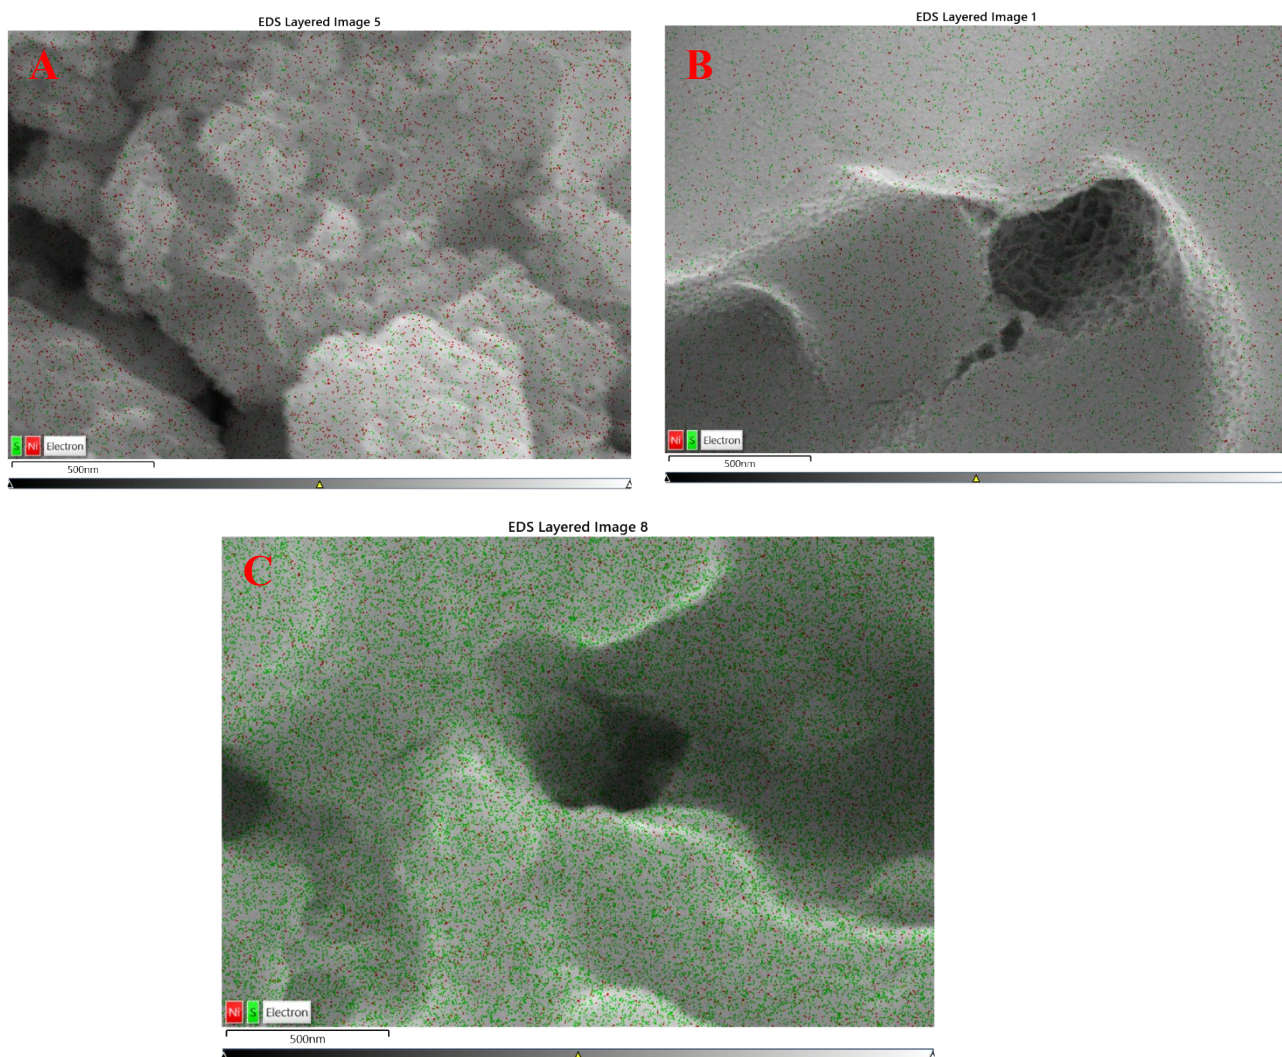

**Figure S2** Elemental mapping results of (A) Ni(OH)<sub>2</sub>-NiS<sub>2</sub>/ sludge-based biochar/GCE, (B) NiS-NiS<sub>2</sub>/ sludge-based biochar/GCE, (C) NiS<sub>2</sub> sludge-based /biochar/GCE

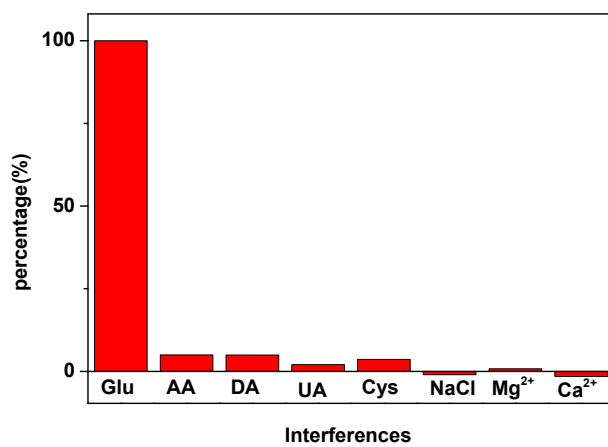

**Figure S3** Current response of glucose and the interfering species on NiS-NiS<sub>2</sub>/sludge-based biochar/GCE in 0.5 mM glucose.
